# Supplementary material for: Water dissociation and association on mirror twin boundaries in two-dimensional MoSe2: insights from density functional theory calculations
Source: Royal Society of Chemistry journal article supplement (doi:10.1039/d1na00429h), 2021-01-01
Supplement: d1na00429h1.pdf [file d1na00429h1.pdf]

# Water dissociation and association on mirror twin boundaries in two-dimensional MoSe<sub>2</sub>: insights from density functional theory calculations

T. Joseph<sup>1</sup>, M. Ghorbani-Asl<sup>1</sup>, M. Batzill<sup>2</sup>, and Arkady V. Krashennnikov<sup>1,3</sup>

<sup>1</sup>Institute of Ion Beam Physics and Materials Research, Helmholtz-Zentrum  
Dresden-Rossendorf, 01328 Dresden, Germany

<sup>2</sup>Department of Physics, University of South Florida, Tampa, FL 33620, USA

<sup>3</sup>Department of Applied Physics, Aalto University, P.O. Box 11100, 00076 Aalto,  
Finland

## 1 Oxygen Reduction Reaction

The free energy of reactions detailed in Eq.(3) to Eq.(4) in the paper can be expressed using Eq.(2) as (see Ref. [1] for detail):

$$\Delta G_1 = G_{\text{OOH}}^* - G_{\text{O}_2}^* - 0.5G_{\text{H}_2} + U_{\text{eq}} \quad (\text{S1})$$

$$\Delta G_2 = G_{\text{O}}^* + G_{\text{H}_2\text{O}} - G_{\text{OOH}}^* - 0.5G_{\text{H}_2} + U_{\text{eq}} \quad (\text{S2})$$

$$\Delta G_3 = G_{\text{OH}}^* - G_{\text{O}}^* - 0.5G_{\text{H}_2} + U_{\text{eq}} \quad (\text{S3})$$

$$\Delta G_4 = G_{\text{H}_2\text{O}} + G_{\text{O}}^* - G_{\text{OH}}^* - 0.5G_{\text{H}_2} + U_{\text{eq}} \quad (\text{S4})$$

where  $U_{\text{eq}} = eU - k_{\text{B}}T \ln 10 \times pH$ . However, due to the high-spin ground state of the O<sub>2</sub> molecule, the free energy is poorly described within the framework of DFT. To circumvent this problem when using the Eq.S1-S4, the reaction free energy of following equations is used:

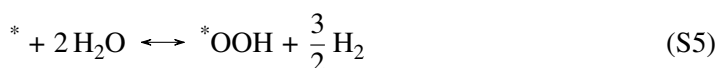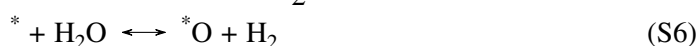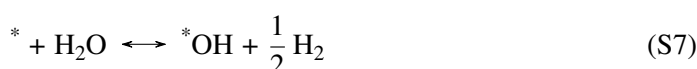

Thus, the reaction free energies, Eqs. S5 to Eq. S7, can be expressed as:

$$\Delta G_{\text{OOH}}^* = 1.5G_{\text{H}_2} + G_{\text{OOH}}^* - 2G_{\text{H}_2\text{O}} - G_{\text{O}}^* \quad (\text{S8})$$

$$\Delta G_{\text{O}}^* = G_{\text{H}_2} + G_{\text{O}}^* - G_{\text{H}_2\text{O}} - G_{\text{O}}^* \quad (\text{S9})$$

$$\Delta G_{\text{OH}}^* = 0.5G_{\text{H}_2} + G_{\text{OH}}^* - G_{\text{H}_2\text{O}} - G_{\text{O}}^* \quad (\text{S10})$$

At equilibrium potential of 1.23 V, the reaction free energy of  $\text{O}_2 + 4\text{H}^+ + 4\text{e}^- \longleftrightarrow 2\text{H}_2\text{O}$  is 4.92 eV. Combining with Eqs. S8 – S10, the free energy in Eqs. S1 – S4 can be rewritten as:

$$\Delta G_1 = \Delta G_{\text{OOH}}^* - 4.92 + U_{\text{eq}} \quad (\text{S11})$$

$$\Delta G_2 = \Delta G_{\text{O}}^* - \Delta G_{\text{OOH}}^* + U_{\text{eq}} \quad (\text{S12})$$

$$\Delta G_3 = \Delta G_{\text{OH}}^* - \Delta G_{\text{O}}^* + U_{\text{eq}} \quad (\text{S13})$$

$$\Delta G_4 = -\Delta G_{\text{OH}}^* + U_{\text{eq}} \quad (\text{S14})$$

## References

- [1] S. Tian, C. Deng, Y. Tang, and Q. Tang. Effect of adatom doping on the electrochemical performance of 1t-mos2 for oxygen reduction reactions. *The Journal of Physical Chemistry C*, 124(45):24899–24907, Nov 2020.

Table S1: Bond length .

| Bond length      | Pristine | 44IP  | 44IE  | 55I8         |
|------------------|----------|-------|-------|--------------|
| H <sub>2</sub> O | 2.6 Å    | 2.6 Å | 2.5 Å | 2.4 Å        |
| OH [O–Se]        | 2.1 Å    | 2.1 Å | 1.9 Å | 1.9 Å        |
| O [O–Se]         | 1.7 Å    | 1.7 Å | 1.7 Å | 2.0 Å [O–Mo] |
| H [H–Mo]         | 1.9 Å    | 1.9 Å | 1.9 Å | 1.8 Å        |

Table S2: Overpotential.

| Overpotential | Pristine | 44IP   | 44IE   | 55I8   |
|---------------|----------|--------|--------|--------|
| -             | 1.34 V   | 1.26 V | 1.19 V | 1.25 Å |

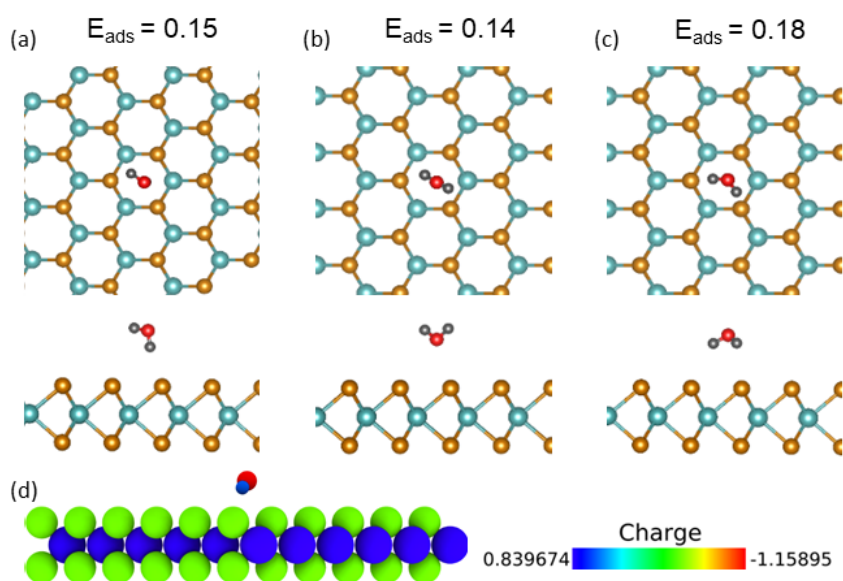

Figure S1: (a)-(c) Water adsorption on MoSe<sub>2</sub> at various sites. (d) Bader analysis of H<sub>2</sub>O on MoSe<sub>2</sub>. The charge analysis shows slight polar behaviour of MoSe<sub>2</sub> indicating that the electrostatic attraction is the main reason for orientation of H<sub>2</sub>O in the most favourable absorption configuration i.e. schematic (c).

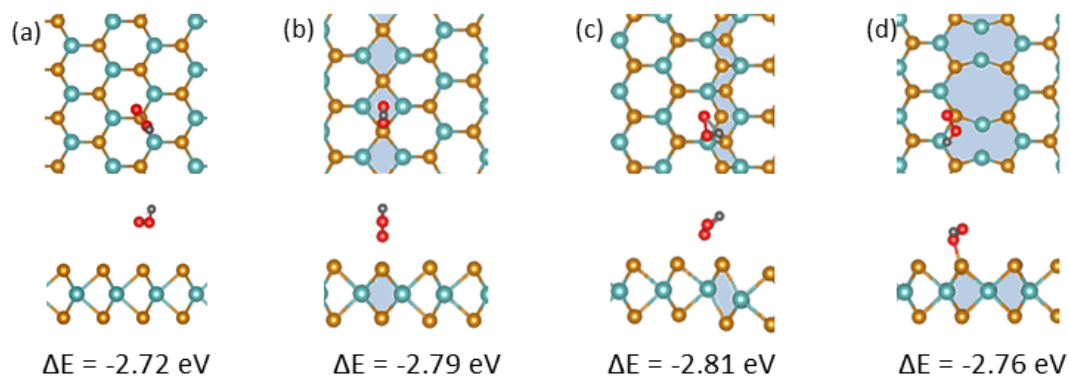

Figure S2: (a)-(d) OOH adsorption on MoSe<sub>2</sub> at various sites. (a) Pristine (b) 44IP (c) 44IE (d) 55I8.

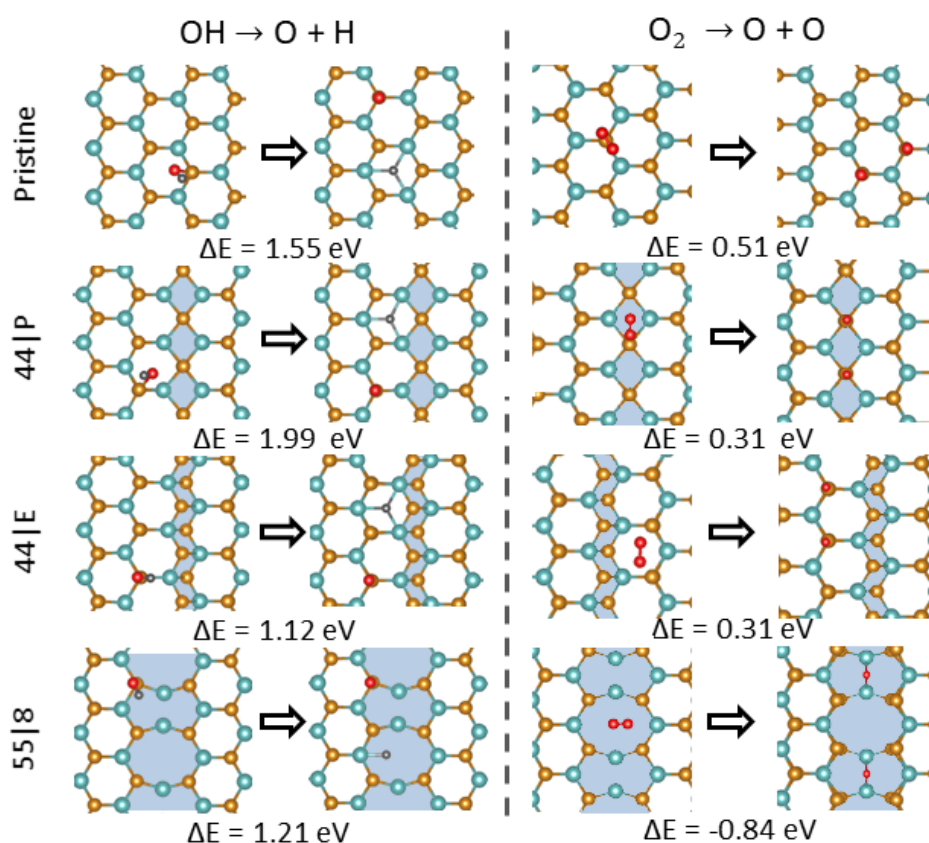

Figure S3: Schematic view of OH and O<sub>2</sub> association and dissociation reactions: on Pristine, 44|P, 44|E and 55|8 systems.

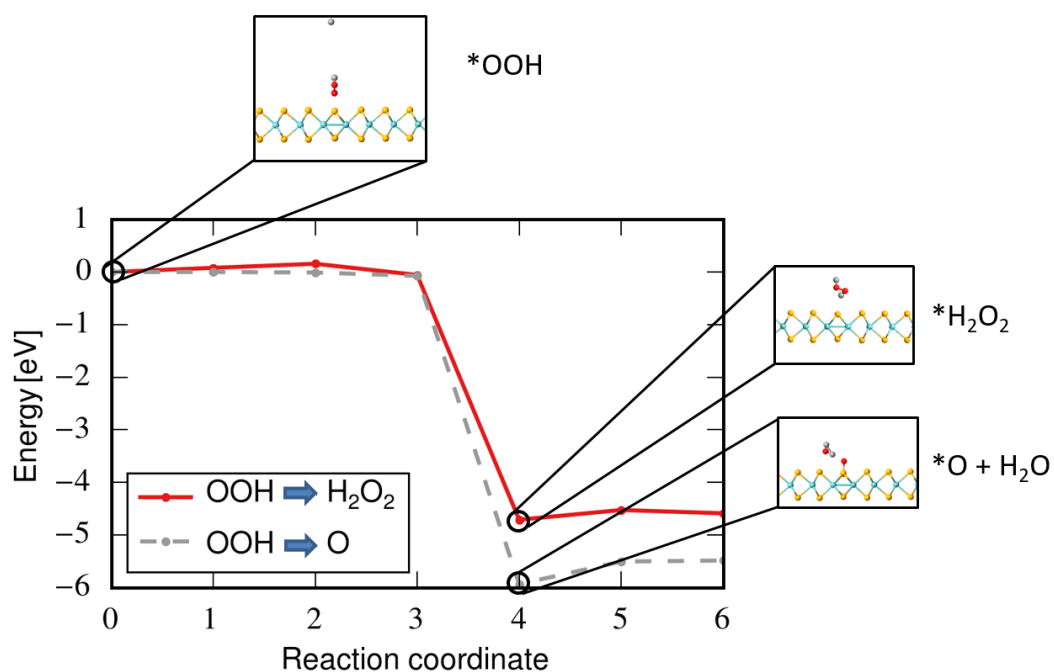

Figure S4: The energy diagram for the 2- (red) and 4-electron (gray) oxygen reduction, on 44|P MTB. The electrochemical barrier for \*OOH to \*O is slightly lower than that for \*OOH to H<sub>2</sub>O<sub>2</sub>.

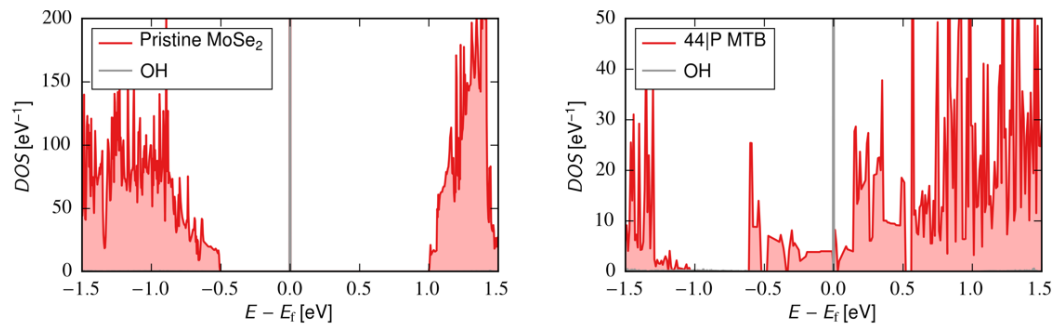

Figure S5: Projected density of states (PDOS) for OH adsorbed on pristine and 44IP MTB MoSe<sub>2</sub>. The red and gray lines indicate the states for the MoSe<sub>2</sub> monolayer and adsorbate, respectively..
